# Supplementary material for: Sensitivity to Emotion Intensity and Recognition of Emotion Expression in Neurotypical Children
Source: MDPI journal article supplement (doi:10.3390/children8121108), 2021-12-01
Supplement: s1 [file s1]

## Supplementary material

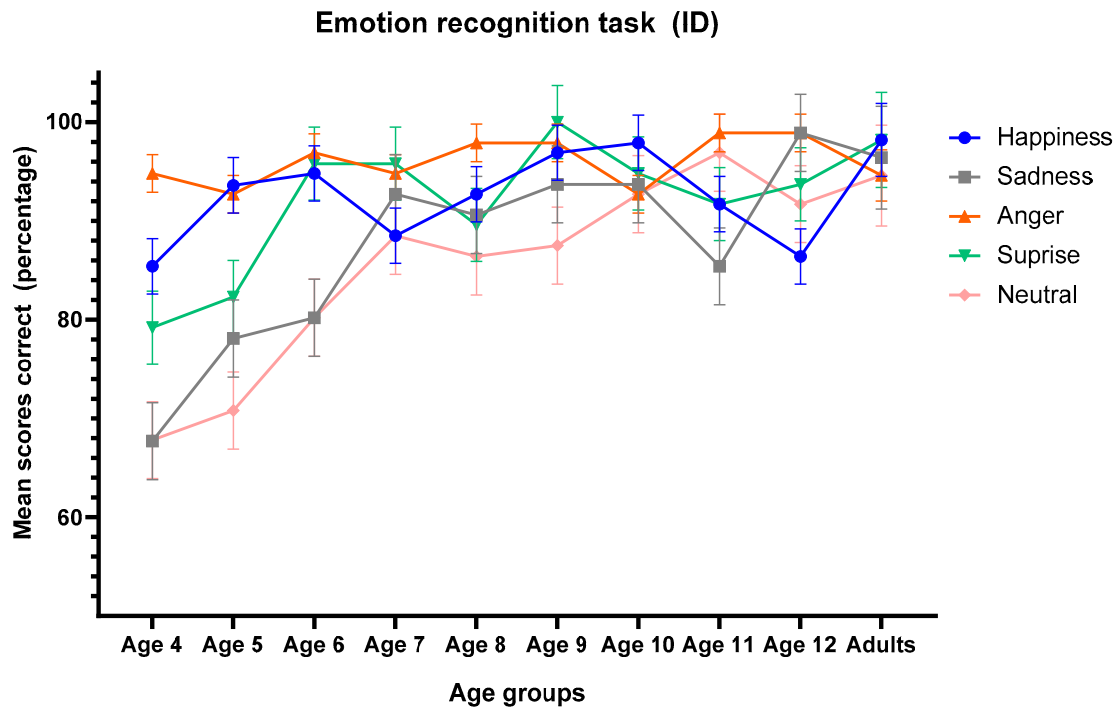

**Figure S1.** Mean scores corrects (percentage) and standard deviations for the expression identification task (ID) according to the conditions Emotion (Happiness, Sadness, Anger, Surprise and Neutral) and Age Groups (4 to Adults).

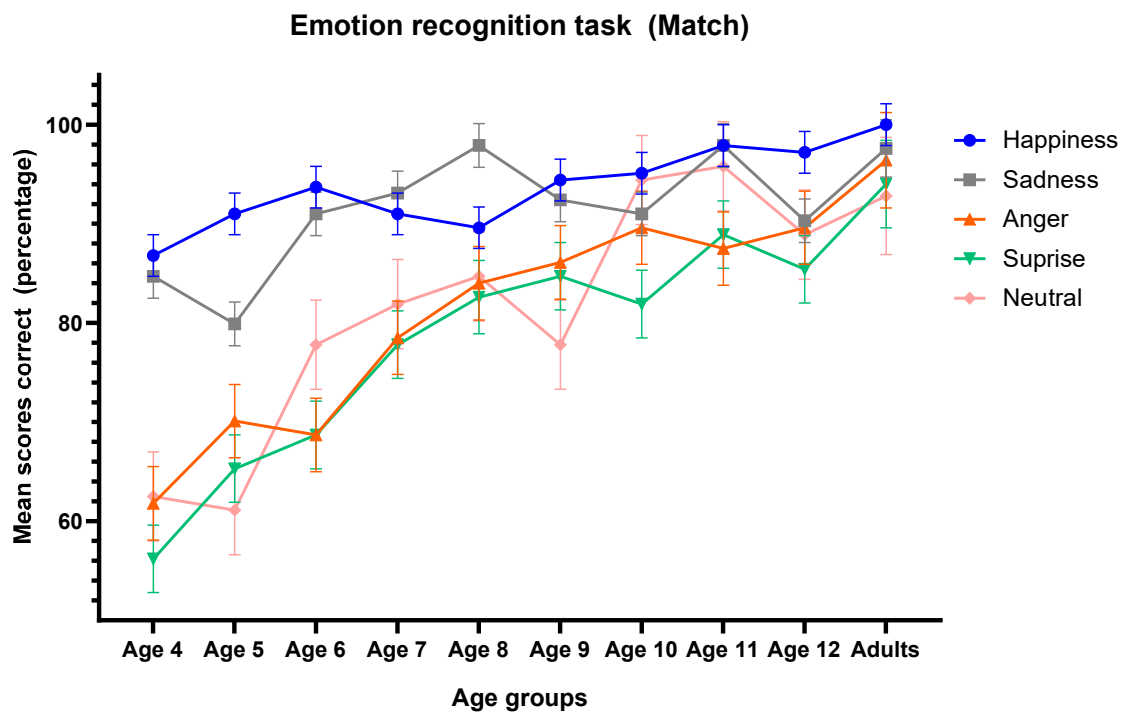

**Figure S2.** Mean scores corrects (percentage) and standard deviations for the expression matching task (Match) according to the conditions Emotion (Happiness, Sadness, Anger, Surprise and Neutral) and Age Groups (4 to Adults).

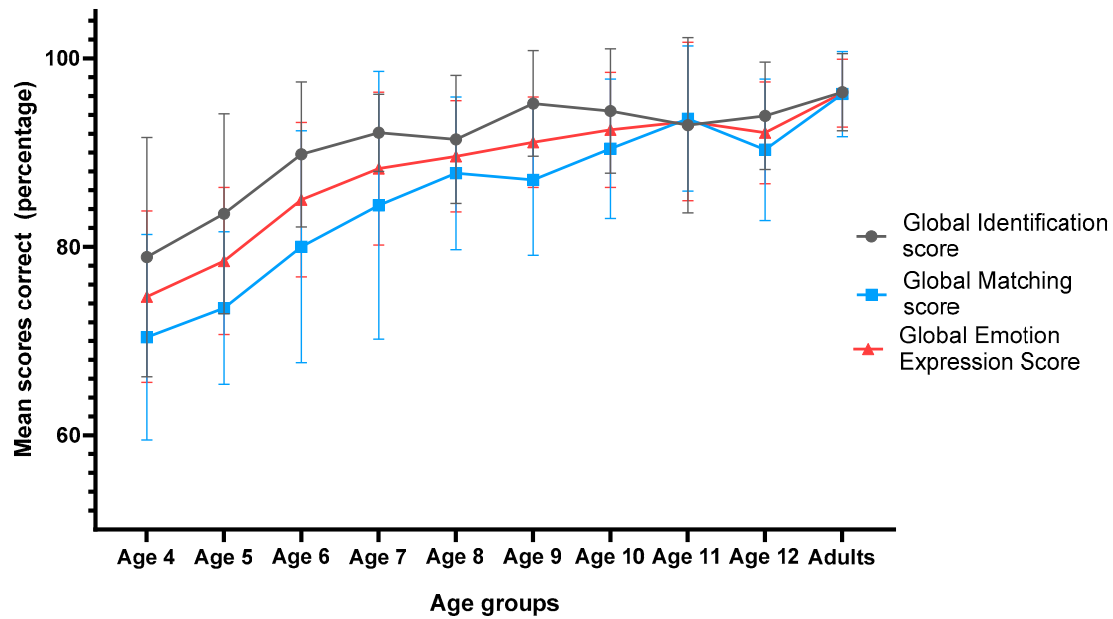

**Figure S3.** Mean scores corrects (percentage) and standard deviations of global scores obtained in Emotion Expression tests according to the conditions Emotion (Happiness, Sadness, Anger, Surprise and Neutral) Task (Identification vs Matching) and Age Groups (4 to Adults).

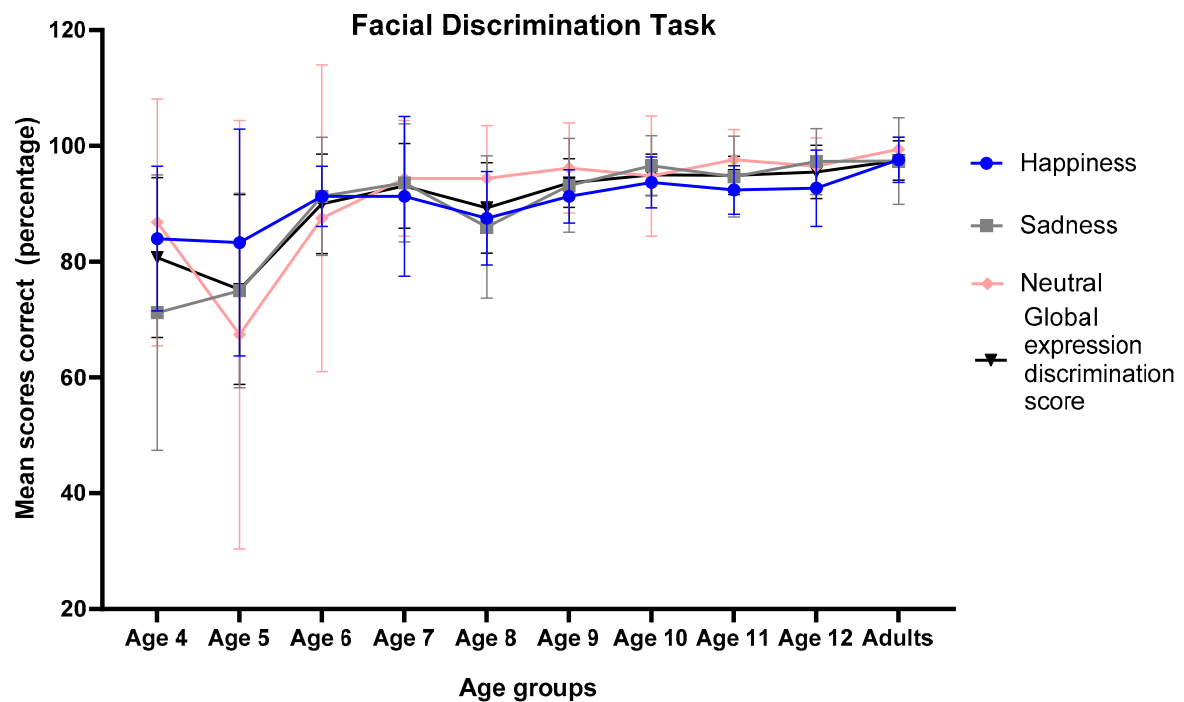

**Figure S4.** Mean scores corrects (percentage) and standard deviations for the Facial Discrimination Task according to the conditions Emotion (Happiness, Sadness, and Neutral) and Age Groups (4 to Adults). The global expression discrimination score is also represented on this graph.

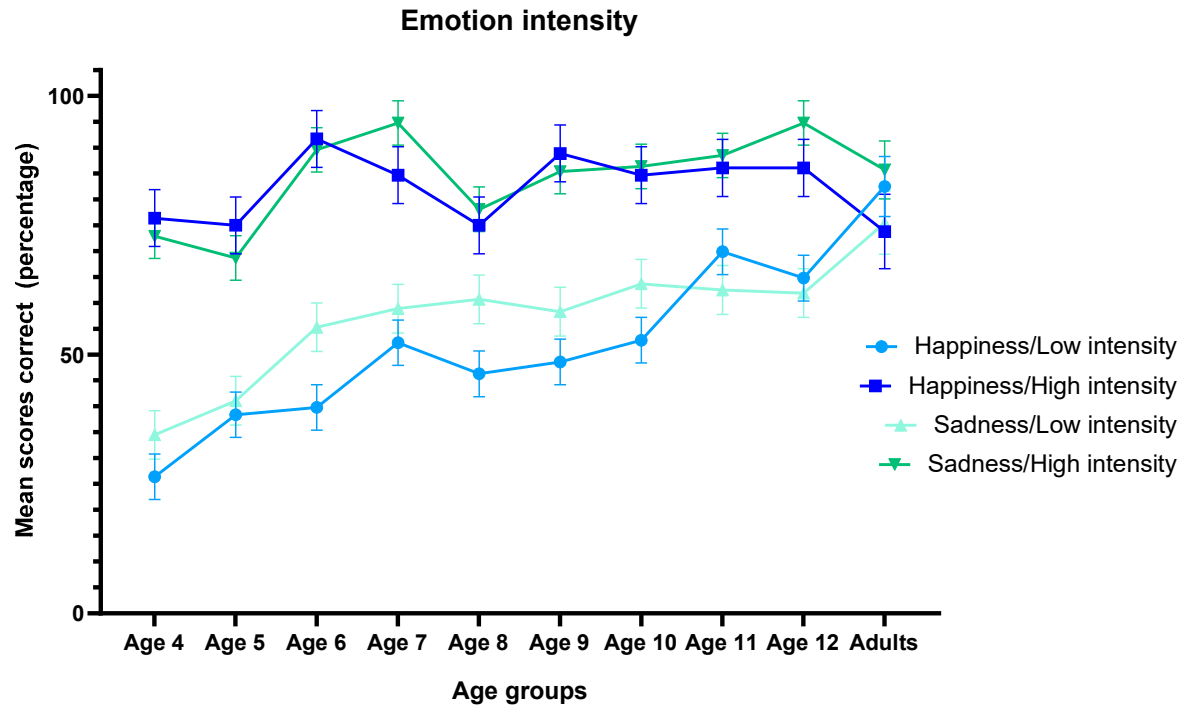

**Figure S5.** Mean scores corrects (percentage) and standard deviations for each intensity in the Facial Discrimination Task according to the conditions Emotion (Happiness, Sadness, and Neutral), to the intensity (low vs high) and Age Groups (4 to Adults).

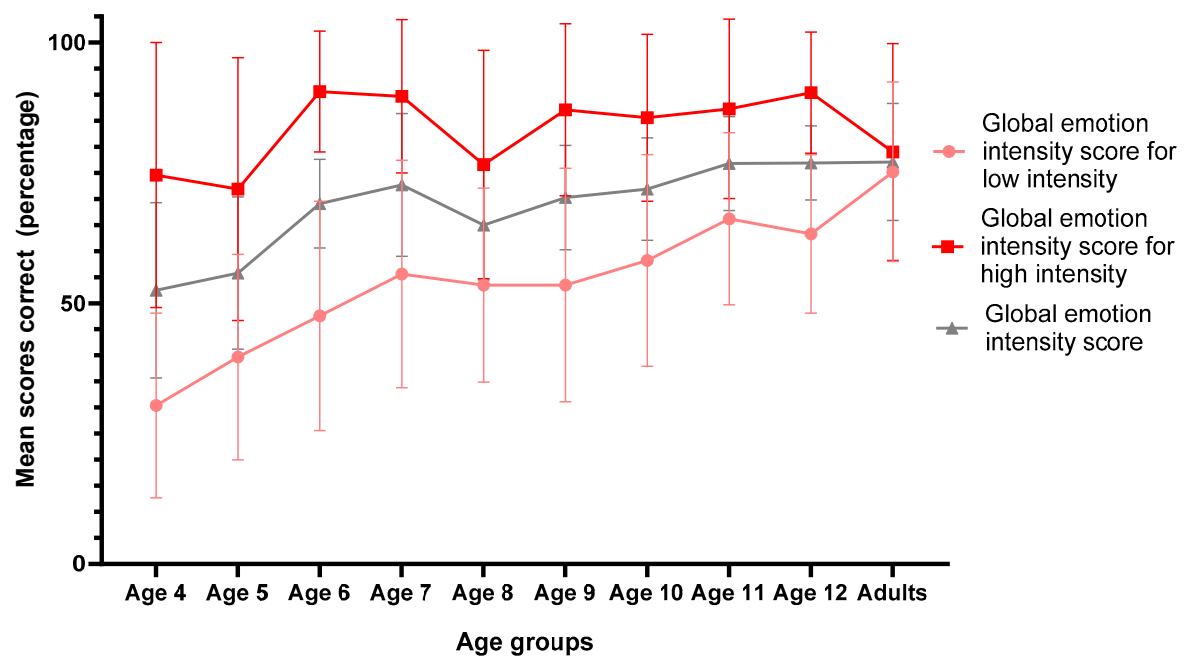

**Figure S6.** Mean scores corrects (percentage) and standard deviations of global scores obtained in the Facial Discrimination Task according to the intensity (low vs high) and Age Groups (4 to Adults).

**Table S1.** Results obtained for the Levene's test for homogeneity of variances.

| <b>Task</b>                                     | <b>Variables</b>                                  | <b>Ms Effect</b> | <b>F</b> | <b>p-value</b> |
|-------------------------------------------------|---------------------------------------------------|------------------|----------|----------------|
| <b>Emotion Expression tests (ID task)</b>       | Happiness                                         | 510,804          | 7,62432  | 0,000000*      |
|                                                 | Sadness                                           | 1274,587         | 10,77068 | 0,000000*      |
|                                                 | Fear                                              | 260,258          | 6,49232  | 0,000000*      |
|                                                 | Surprise                                          | 1294,048         | 9,14673  | 0,000000*      |
|                                                 | Neutral                                           | 925,373          | 8,95135  | 0,000000*      |
|                                                 | Total score                                       | 106,244          | 4,16731  | 0,000054*      |
| <b>Emotion Expression tests (Matching task)</b> | Happiness                                         | 165,131          | 4,84299  | 0,000006*      |
|                                                 | Sadness                                           | 197,225          | 4,91943  | 0,000005*      |
|                                                 | Fear                                              | 230,906          | 1,81358  | 0,066740       |
|                                                 | Surprise                                          | 326,422          | 4,09122  | 0,000068*      |
|                                                 | Neutral                                           | 904,710          | 6,56939  | 0,000000*      |
|                                                 | Total score                                       | 92,572           | 2,72299  | 0,004913*      |
| <b>Facial Discrimination Task</b>               | Happiness                                         | 321,809          | 6,86212  | 0,000000*      |
|                                                 | Sadness                                           | 487,880          | 9,86974  | 0,000000*      |
|                                                 | Neutral                                           | 2032,656         | 19,05683 | 0,000000*      |
|                                                 | Global expression discrimination score            | 354,652          | 13,44377 | 0,000000*      |
|                                                 | Happiness/low intensity                           | 339,300          | 2,48418  | 0,010030*      |
|                                                 | Happiness/high intensity                          | 654,278          | 2,76847  | 0,004282*      |
|                                                 | Sadness/low intensity                             | 96,165           | 0,58159  | 0,811633       |
|                                                 | Sadness/high intensity                            | 545,501          | 3,64227  | 0,000284*      |
|                                                 | Global emotion intensity score for low intensity  | 167,044          | 1,43262  | 0,174995       |
|                                                 | Global emotion intensity score for high intensity | 325,330          | 2,45396  | 0,010965*      |
|                                                 | Global emotion intensity score                    | 100,976          | 1,72915  | 0,083387       |

\* indicated that the p-value &lt; 0.05

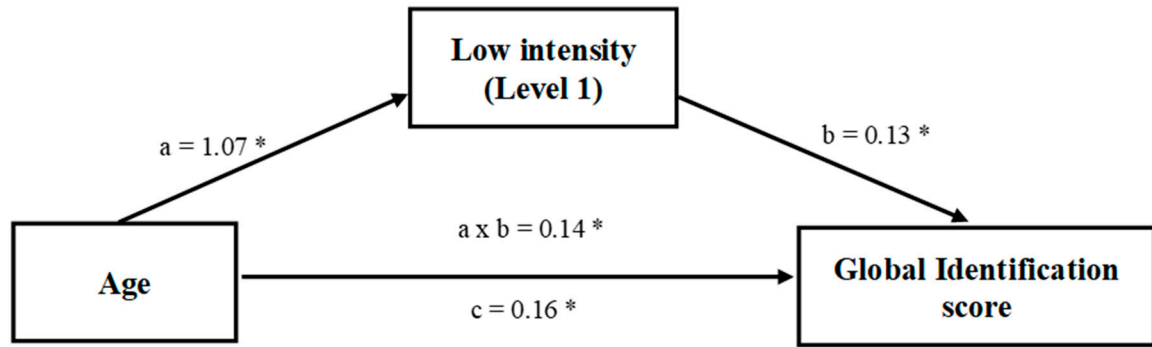

\* Indicated that the parameter is significant ( $p < 0.05$ )

**Figure S7.** The ability to attribute low intensity emotional expressions mediates, in a complementary manner, the relationship between age and the Global Identification score. The significant indirect effect ( $a \times b = 0.14$ ; 95% CI [0.07, 0.23] not containing zero which confirmed the existence of a mediation.

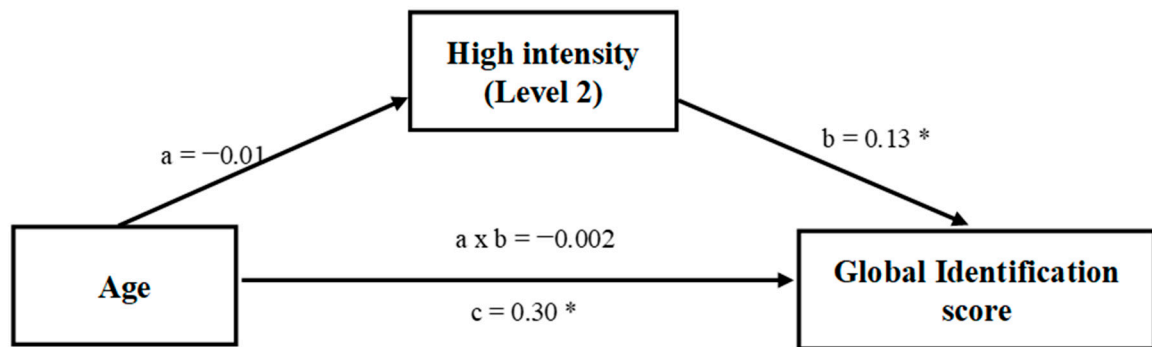

\* Indicated that the parameter is significant ( $p < 0.05$ )

**Figure S8.** The ability to attribute high intensity emotional expressions was not a mediator of the relationship between age and the Global Identification score. The non-significant indirect effect ( $a \times b = -0.002$ ; 95% CI [-0.04, 0.43] containing zero which confirmed the absence of an indirect mediation.

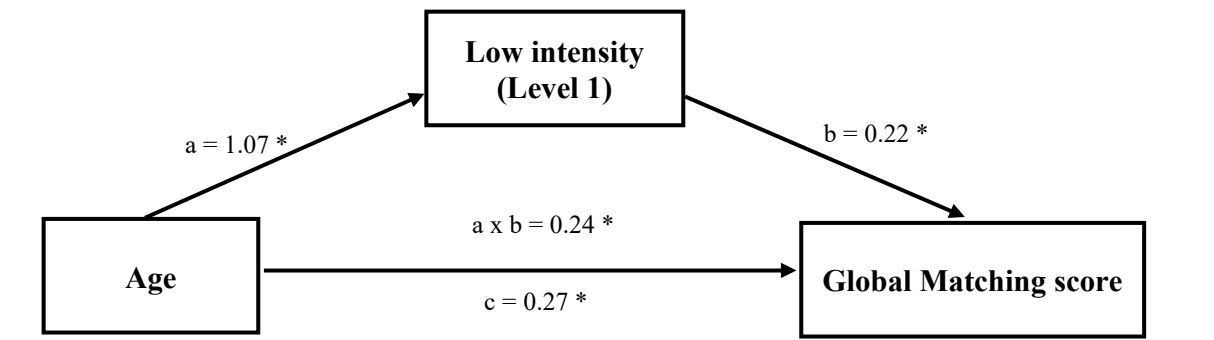

\* Indicated that the parameter is significant ( $p < 0.05$ )

**Figure S9.** The ability to attribute low intensity emotional expressions mediates, in a complementary manner, the relationship between age and the Global Matching score. The significant indirect effect ( $a \times b = 0.24$ ; 95% CI [0.14, 0.36] not containing zero which confirmed the existence of a mediation.

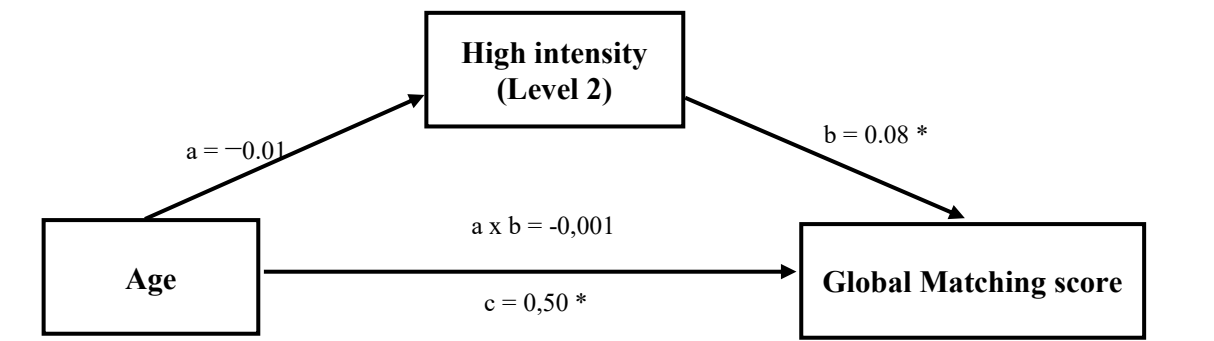

\* Indicated that the parameter is significant ( $p < 0.05$ )

**Figure S10.** The ability to attribute high intensity emotional expressions was not a mediator of the relationship between age and the Global Matching score. The non-significant indirect effect ( $a \times b = -0.001$ ; 95% CI [-0.03, 0.03] containing zero which confirmed the absence of an indirect mediation.
